# Supplementary material
Source: PubMed Central journal article supplement (PMC8018019)
Supplement: BPA-30-106-s002.pdf [file BPA-30-106-s002.pdf]

**Supplementary table 2** SNP alleles, genotype numbers, MAF and Hardy-Weinberg equilibrium: results for Hardy Weinberg equilibrium analysis  
 Results for Hardy Weinberg equilibrium analysis and reported MAF in study cohort compared to MAF in GO-NL database.

| locus      | major | minor | homo-zygote major | homo-zygote minor | hetero-zygote | MAF study population | MAF GO-NL | NCBI MAF EUR-population | HWE p | HWE p.adj |
|------------|-------|-------|-------------------|-------------------|---------------|----------------------|-----------|-------------------------|-------|-----------|
| rs10052957 | G     | A     | 79                | 22                | 86            | 0,348                | A: 0.365  |                         | 0,848 | 0,947     |
| rs10078091 | G     | A     | 95                | 14                | 76            | 0,281                | A: 0.293  |                         | 0,823 | 0,947     |
| rs10178552 | C     | T     | 73                | 25                | 87            | 0,370                | T: 0.344  |                         | 0,909 | 0,947     |
| rs10243024 | G     | A     | 119               | 9                 | 54            | 0,198                | A: 0.235  |                         | 0,380 | 0,903     |
| rs10505082 | G     | A     | 123               | 1                 | 62            | 0,172                | A: 0.163  |                         | 0,020 | 0,426     |
| rs10516537 | C     | A     | 132               | 7                 | 45            | 0,160                | A: 0.151  |                         | 0,214 | 0,903     |
| rs1061170  | T     | C     | 70                | 24                | 84            | 0,371                | C: 0.358  |                         | 0,879 | 0,947     |
| rs1064395  | G     | A     | 132               | 5                 | 47            | 0,155                | A: 0.145  |                         | 0,742 | 0,947     |
| rs1065761  | G     | None  | 181               | 0                 | 0             | 0,000                | C: 0.126  |                         | NaN   | NA        |
| rs10977017 | G     | A     | 124               | 5                 | 52            | 0,171                | A: 0.172  |                         | 0,871 | 0,947     |
| rs1133763  | A     | C     | 124               | 3                 | 58            | 0,173                | C: 0.157  |                         | 0,193 | 0,903     |
| rs1137933  | G     | A     | 115               | 8                 | 65            | 0,215                | A: 0.236  |                         | 0,754 | 0,947     |
| rs11652878 | A     | G     | 160               | 1                 | 25            | 0,073                | G: 0.105  |                         | 0,982 | 0,992     |
| rs11666377 | C     | T     | 134               | 3                 | 52            | 0,153                | T: 0.162  |                         | 0,417 | 0,903     |
| rs11719646 | A     | G     | 61                | 23                | 99            | 0,396                | G: 0.375  |                         | 0,077 | 0,785     |
| rs11750073 | C     | T     | 122               | 7                 | 55            | 0,188                | T: 0.185  |                         | 0,797 | 0,947     |
| rs11765693 | A     | G     | 81                | 13                | 87            | 0,312                | G: 0.266  |                         | 0,108 | 0,790     |
| rs11957313 | G     | A     | 132               | 6                 | 49            | 0,163                | A: 0.156  |                         | 0,583 | 0,947     |
| rs12111597 | G     | A     | 99                | 10                | 73            | 0,255                | A: 0.238  |                         | 0,464 | 0,903     |
| rs12127450 | T     | C     | 133               | 3                 | 47            | 0,145                | C: 0.160  |                         | 0,617 | 0,947     |
| rs12644284 | A     | G     | 103               | 13                | 69            | 0,257                | G: 0.295  |                         | 0,757 | 0,947     |
| rs13019537 | C     | G     | 126               | 4                 | 57            | 0,174                | G: 0.182  |                         | 0,401 | 0,903     |
| rs13067869 | T     | G     | 147               | 2                 | 30            | 0,095                | G: 0.085  |                         | 0,737 | 0,947     |
| rs1318     | A     | G     | 117               | 5                 | 60            | 0,192                | G: 0.193  |                         | 0,409 | 0,903     |
| rs13387792 | G     | A     | 164               | 0                 | 23            | 0,061                | A: 0.076  |                         | 0,370 | 0,903     |
| rs1386330  | T     | C     | 142               | 1                 | 39            | 0,113                | C: 0.132  |                         | 0,332 | 0,903     |
| rs1448239  | G     | C     | 130               | 1                 | 53            | 0,149                | C: 0.164  |                         | 0,071 | 0,785     |
| rs156429   | T     | C     | 62                | 32                | 91            | 0,419                | C: 0.406  |                         | 0,888 | 0,947     |
| rs1597944  | T     | C     | 56                | 43                | 87            | 0,465                | C: 0.442  |                         | 0,414 | 0,903     |
| RS16925027 | A     | G     | 111               | 8                 | 62            | 0,215                | G: 0.219  |                         | 0,859 | 0,947     |
| rs17157903 | C     | T     | 150               | 3                 | 34            | 0,107                | T: 0.136  |                         | 0,510 | 0,903     |
| rs17398267 | T     | G     | 112               | 14                | 58            | 0,234                | G: 0.271  |                         | 0,104 | 0,790     |
| rs17505688 | T     | C     | 154               | 2                 | 26            | 0,082                | C: 0.073  |                         | 0,454 | 0,903     |
| rs17541777 | T     | C     | 145               | 2                 | 34            | 0,105                | C: 0.152  |                         | 0,997 | 0,997     |
| rs1761667  | A     | G     | 58                | 39                | 85            | 0,448                | G: 0.473  |                         | 0,453 | 0,903     |
| rs1799987  | A     | G     | 55                | 43                | 88            | 0,468                | G: 0.481  |                         | 0,497 | 0,903     |
| rs1800682  | T     | C     | 43                | 41                | 100           | 0,495                | G: 0.470  | C:0.4314                | 0,237 | 0,903     |
| rs1869410  | T     | C     | 88                | 19                | 71            | 0,306                | C: 0.267  |                         | 0,414 | 0,903     |
| rs1883832  | C     | T     | 109               | 11                | 68            | 0,239                | T: 0.234  |                         | 0,927 | 0,947     |
| rs1927457  | T     | C     | 79                | 14                | 84            | 0,316                | C: 0.315  |                         | 0,196 | 0,903     |
| rs2028455  | C     | T     | 82                | 19                | 84            | 0,330                | T: 0.316  |                         | 0,711 | 0,947     |
| rs2037815  | A     | G     | 46                | 42                | 99            | 0,489                | G: 0.461  |                         | 0,417 | 0,903     |
| rs2039485  | T     | C     | 104               | 10                | 74            | 0,250                | C: 0.247  |                         | 0,496 | 0,903     |
| rs2069727  | A     | G     | 45                | 43                | 92            | 0,494                | C: 0.497  | C:0.4632                | 0,764 | 0,947     |
| rs2069762  | T     | G     | 110               | 11                | 65            | 0,234                | C: 0.266  | G:0,2922                | 0,735 | 0,947     |
| rs2074897  | G     | A     | 54                | 33                | 94            | 0,442                | A: 0.485  |                         | 0,477 | 0,903     |
| rs2107538  | C     | T     | 119               | 5                 | 59            | 0,189                | T: 0.179  |                         | 0,467 | 0,903     |
| rs2116078  | G     | T     | 49                | 38                | 93            | 0,469                | T: 0.462  |                         | 0,618 | 0,947     |
| rs2234978  | C     | T     | 81                | 22                | 83            | 0,341                | T: 0.331  |                         | 0,917 | 0,947     |
| rs2236851  | C     | T     | 126               | 7                 | 53            | 0,180                | T: 0.175  |                         | 0,631 | 0,947     |
| rs231775   | A     | G     | 73                | 21                | 95            | 0,362                | G: 0.391  |                         | 0,228 | 0,903     |
| rs2399849  | G     | A     | 134               | 2                 | 46            | 0,137                | A: 0.176  |                         | 0,370 | 0,903     |
| rs2569190  | G     | A     | 43                | 39                | 96            | 0,489                | A: 0.483  |                         | 0,291 | 0,903     |
| rs261902   | C     | T     | 114               | 8                 | 57            | 0,204                | A: 0.165  | T:0,1700                | 0,797 | 0,947     |
| rs263153   | G     | T     | 148               | 0                 | 37            | 0,100                | T: 0.083  |                         | 0,131 | 0,833     |
| rs2766051  | G     | A     | 145               | 4                 | 34            | 0,115                | A: 0.131  |                         | 0,247 | 0,903     |
| rs2796267  | A     | G     | 54                | 36                | 86            | 0,449                | G: 0.422  |                         | 0,869 | 0,947     |
| rs2803418  | G     | T     | 91                | 10                | 80            | 0,276                | T: 0.245  |                         | 0,156 | 0,903     |
| RS2853744  | G     | T     | 171               | 2                 | 15            | 0,051                | T: 0.045  |                         | 0,021 | 0,426     |
| rs299175   | C     | T     | 53                | 39                | 87            | 0,461                | A: 0.464  | T: 0.4433               | 0,769 | 0,947     |

|            |                                                  |   |     |    |    |       |          |           |       |       |
|------------|--------------------------------------------------|---|-----|----|----|-------|----------|-----------|-------|-------|
| rs3014866  | T                                                | C | 54  | 39 | 95 | 0,460 | T: 0.478 |           | 0,814 | 0,947 |
| rs305124   | A                                                | G | 151 | 1  | 33 | 0,095 | G: 0.063 |           | 0,574 | 0,947 |
| rs3116496  | T                                                | C | 134 | 4  | 45 | 0,145 | C: 0.175 |           | 0,923 | 0,947 |
| rs3130253  | G                                                | A | 134 | 4  | 45 | 0,145 | A: 0.083 |           | 0,923 | 0,947 |
| rs3212227  | A                                                | C | 125 | 7  | 44 | 0,165 | G: 0.164 | C:0.2227  | 0,224 | 0,903 |
| rs333      | GTCAGTA<br>TCAATTC<br>TGGAAG<br>AATTTCC<br>AGACA | - | 154 | 5  | 26 | 0,097 | NA       | -:0,106   | 0,007 | 0,222 |
| rs337718   | C                                                | T | 91  | 15 | 78 | 0,293 | T: 0.283 |           | 0,763 | 0,947 |
| rs3814022  | C                                                | G | 114 | 6  | 64 | 0,207 | G: 0.229 |           | 0,406 | 0,903 |
| rs3865444  | G                                                | T | 86  | 28 | 75 | 0,347 | A: 0.308 | T: 0.3101 | 0,089 | 0,790 |
| rs404694   | A                                                | C | 92  | 14 | 79 | 0,289 | C: 0.317 |           | 0,599 | 0,947 |
| rs41423247 | G                                                | C | 88  | 31 | 65 | 0,345 | C: 0.381 |           | 0,003 | 0,155 |
| rs423904   | C                                                | T | 91  | 8  | 80 | 0,268 | T: 0.269 |           | 0,064 | 0,785 |
| rs4747075  | G                                                | A | 86  | 30 | 58 | 0,339 | A: 0.353 |           | 0,001 | 0,074 |
| rs4819554  | A                                                | G | 145 | 4  | 38 | 0,123 | G: 0.182 |           | 0,427 | 0,903 |
| rs4880213  | C                                                | T | 63  | 24 | 99 | 0,395 | T: 0.389 |           | 0,122 | 0,828 |
| rs4953911  | A                                                | T | 103 | 8  | 74 | 0,243 | T: 0.256 |           | 0,239 | 0,903 |
| rs5673     | A                                                | T | 169 | 0  | 17 | 0,046 | T: 0.080 |           | 0,514 | 0,903 |
| rs5742909  | C                                                | T | 154 | 4  | 27 | 0,095 | T: 0.076 |           | 0,044 | 0,643 |
| rs6190     | G                                                | A | 166 | 1  | 20 | 0,059 | T: 0.022 | A:0.02980 | 0,641 | 0,947 |
| rs6198     | T                                                | C | 118 | 9  | 54 | 0,199 | C: 0.206 |           | 0,391 | 0,903 |
| rs6899560  | A                                                | G | 170 | 0  | 18 | 0,048 | G: 0.047 |           | 0,491 | 0,903 |
| rs6917747  | G                                                | A | 137 | 6  | 44 | 0,150 | A: 0.127 |           | 0,299 | 0,903 |
| rs6941421  | T                                                | C | 62  | 28 | 95 | 0,408 | C: 0.383 |           | 0,392 | 0,903 |
| rs6994992  | C                                                | T | 70  | 28 | 90 | 0,388 | T: 0.419 |           | 0,915 | 0,947 |
| rs7134248  | C                                                | T | 54  | 39 | 93 | 0,460 | T: 0.442 |           | 0,929 | 0,947 |
| rs716595f  | G                                                | A | 144 | 1  | 41 | 0,116 | A: 0.078 |           | 0,287 | 0,903 |
| rs7211577  | G                                                | A | 57  | 34 | 96 | 0,439 | G: 0.485 |           | 0,561 | 0,947 |
| rs7253363  | G                                                | T | 180 | 0  | 7  | 0,019 | T: 0.034 |           | 0,794 | 0,947 |
| rs72928038 | G                                                | A | 119 | 2  | 67 | 0,189 | A: 0.173 |           | 0,025 | 0,427 |
| rs744166   | T                                                | C | 63  | 30 | 90 | 0,410 | G: 0.434 |           | 0,822 | 0,947 |
| rs752092   | T                                                | C | 85  | 24 | 81 | 0,339 | G: 0.317 | C:0.3449  | 0,496 | 0,903 |
| rs755622   | C                                                | G | 119 | 3  | 63 | 0,186 | C: 0.192 | G:0.1859  | 0,096 | 0,790 |
| rs7744583  | G                                                | A | 78  | 20 | 85 | 0,342 | A: 0.372 |           | 0,658 | 0,947 |
| rs7914524  | C                                                | T | 110 | 10 | 62 | 0,225 | T: 0.212 |           | 0,746 | 0,947 |
| rs79877597 | C                                                | A | 127 | 6  | 53 | 0,175 | A: 0.197 |           | 0,870 | 0,947 |
| rs8056098  | G                                                | A | 75  | 20 | 89 | 0,351 | A: 0.396 |           | 0,398 | 0,903 |
| rs8192678  | G                                                | A | 90  | 17 | 77 | 0,302 | T: 0.339 | A: 0.3608 | 0,928 | 0,947 |
| rs868824   | T                                                | C | 62  | 40 | 81 | 0,440 | C: 0.455 |           | 0,169 | 0,903 |
| rs876493   | A                                                | G | 71  | 34 | 81 | 0,401 | G: 0.429 |           | 0,204 | 0,903 |
| rs9319189  | G                                                | A | 92  | 13 | 76 | 0,282 | A: 0.330 |           | 0,615 | 0,947 |
| rs9480865  | T                                                | C | 142 | 5  | 39 | 0,132 | C: 0.165 |           | 0,256 | 0,903 |
| rs9808753  | A                                                | G | 134 | 6  | 48 | 0,160 | G: 0.143 |           | 0,510 | 0,903 |
| rs9892479  | G                                                | T | 165 | 1  | 22 | 0,064 | T: 0.060 |           | 0,775 | 0,947 |
