# Supplementary material
Source: PubMed Central journal article supplement (PMC8018019)

**Supplementary figure 4.** Relative gene expression levels of eQTL genes that were not significantly related to the MS pathology-associated SNPs

a. Relative expression levels of genes that the SNPs are located in that were not significantly correlated with the genotype. b. Relative expression levels of the eQTL gene for rs11957313. c. Relative expression levels of the eQTL genes for rs1064395. d. Relative expression of the eQTL gene for rs3130253. E. Relative expression of the eQTL gene for rs2234978.

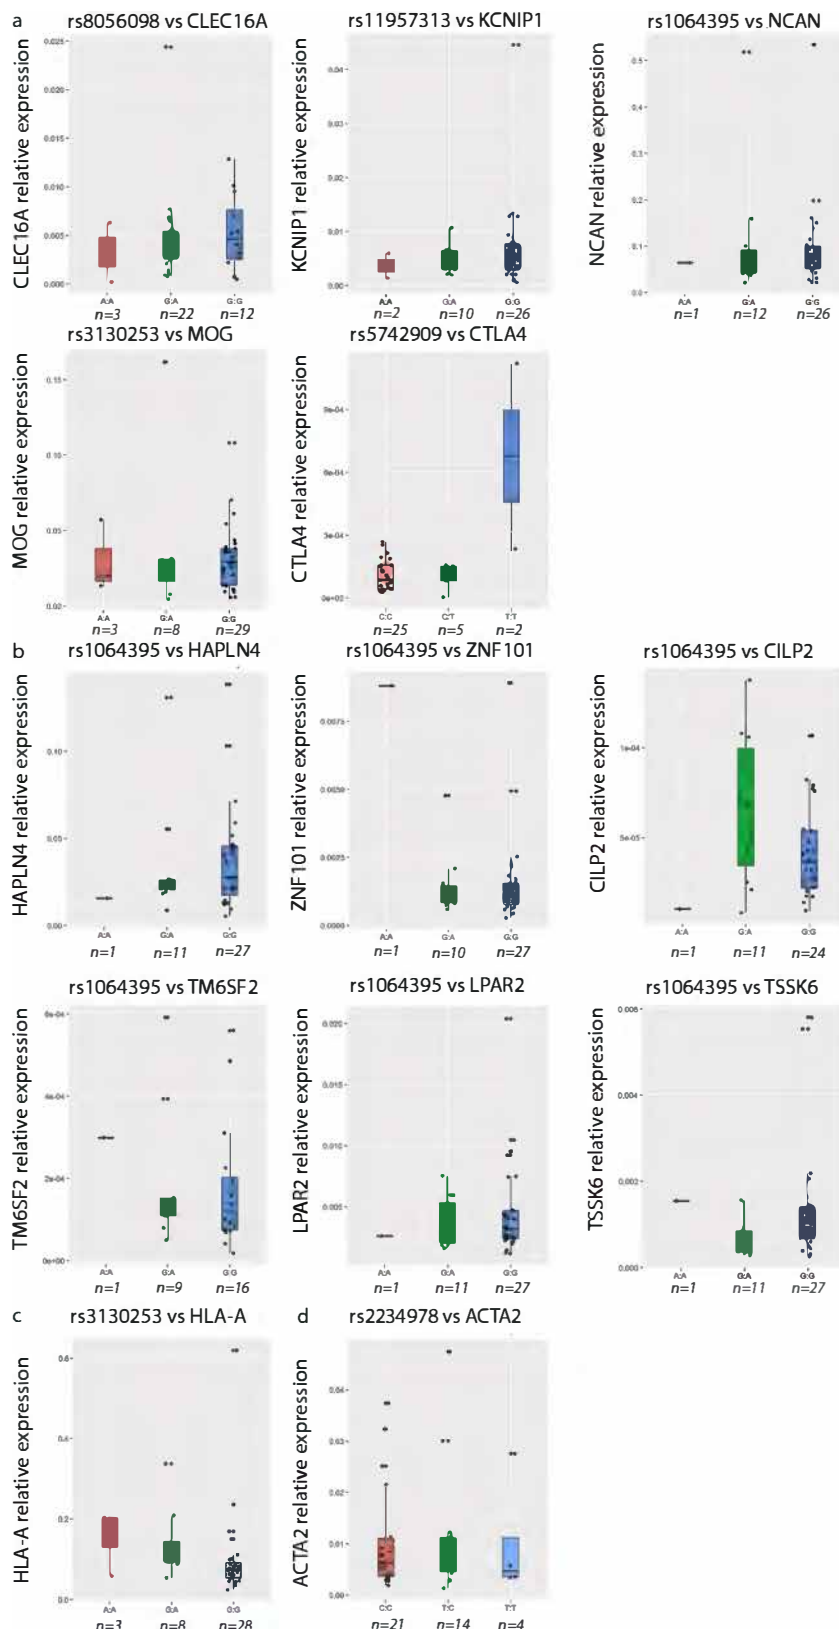

Supplement: BPA-30-106-s010.pdf [file BPA-30-106-s010.pdf]
