# Supplementary material
Source: PubMed Central journal article supplement (PMC8018019)

**Supplementary figure 2.** Single tissue eQTLs of significant SNPs and their SNPs in strong LD in brain tissues and EBV transformed cells (lymphocytes and fibroblasts)

a: rs2234978/FAS single tissue eQTLs. b: rs11957313/KCNIP1 single tissue eQTL c: rs1064395/NCAN single tissue eQTLs d: rs3130253/MOG single tissue eQTL

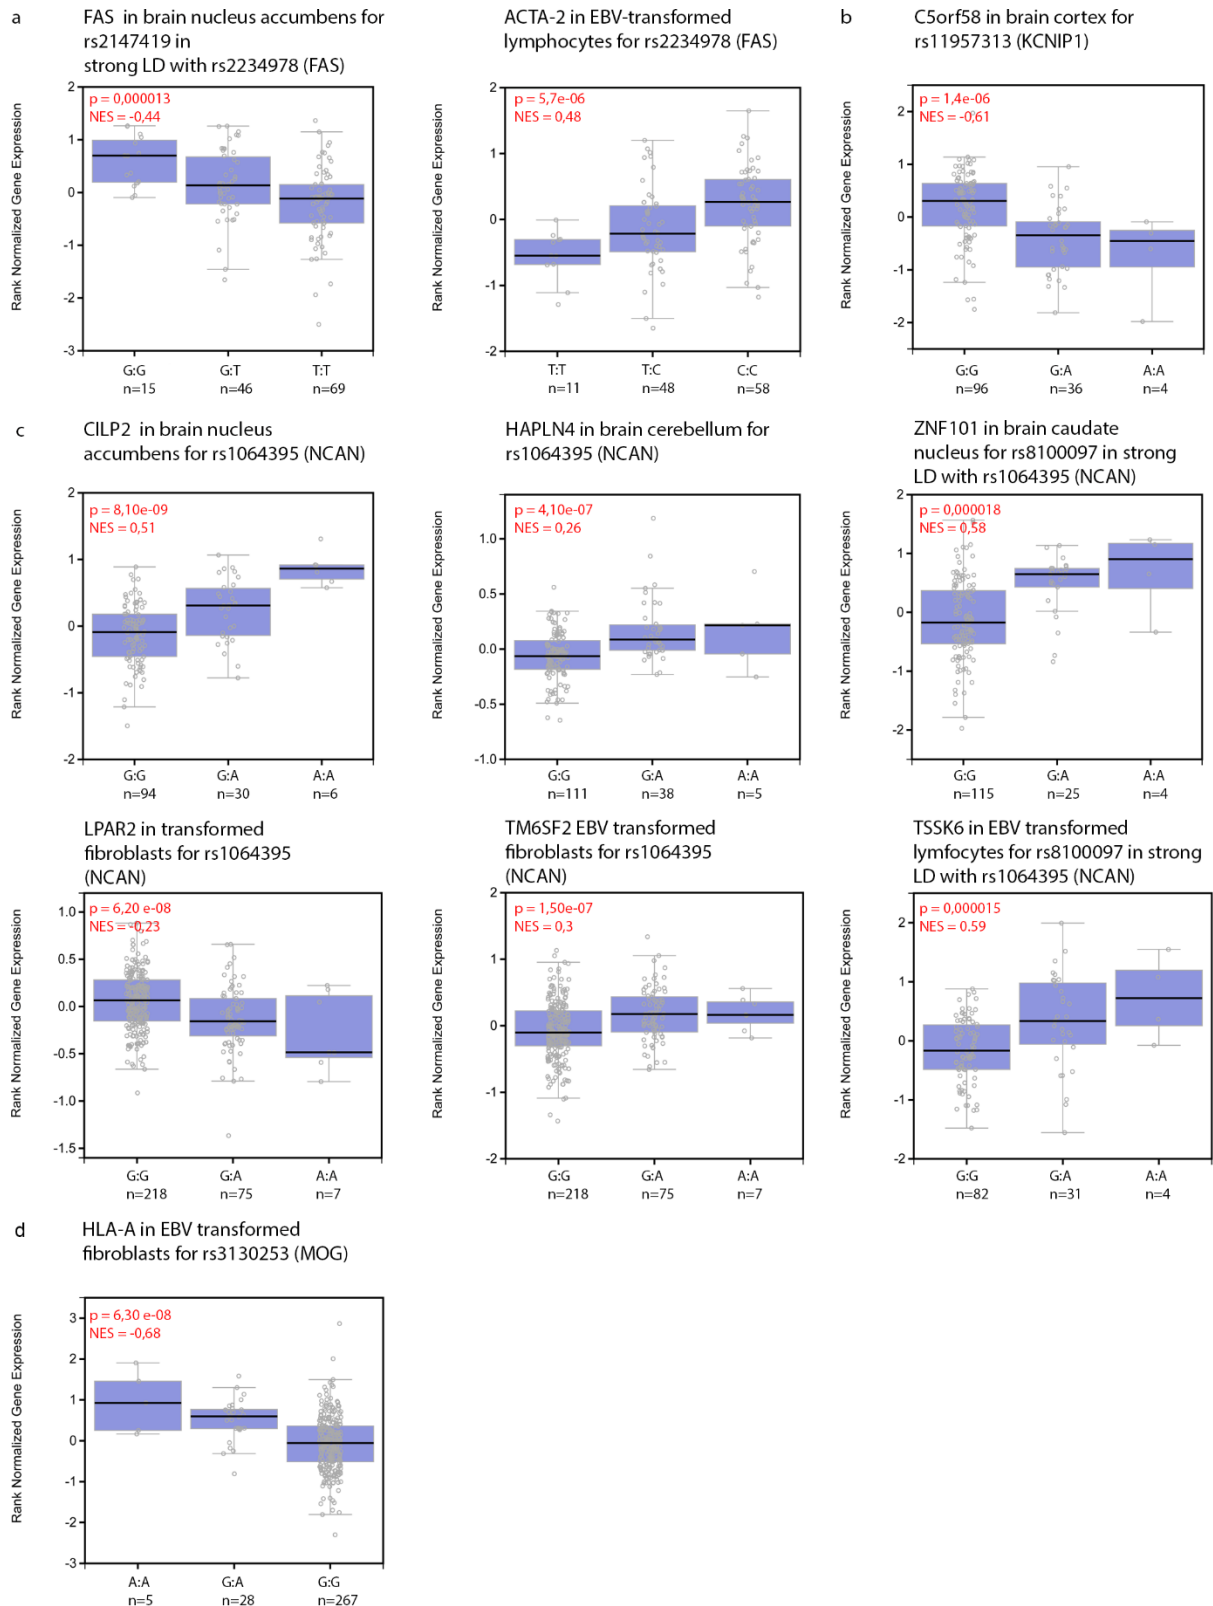

Supplement: BPA-30-106-s013.pdf [file BPA-30-106-s013.pdf]
